# Supplementary material for: Towards Novel Potential Molecular Targets for Antidepressant and Antipsychotic Pharmacotherapies
Source: MDPI journal article supplement (doi:10.3390/ijms24119482), 2023-05-30
Supplement: s1 [file s1]

**Table S1.** Number of active compounds and accuracy of prediction (IAP) for antidepressant and related mechanisms of action.

| <b>Number</b> | <b>IAP</b> | <b>Predictable Activity Type</b>                     |
|---------------|------------|------------------------------------------------------|
| 19174         | 0.897      | Antidepressant                                       |
| 3101          | 0.989      | 5 Hydroxytryptamine 1 agonist                        |
| 1701          | 0.991      | 5 Hydroxytryptamine 1A agonist                       |
| 5764          | 0.984      | 5 Hydroxytryptamine 1A antagonist                    |
| 135           | 0.989      | 5 Hydroxytryptamine 1B agonist                       |
| 1516          | 0.984      | 5 Hydroxytryptamine 1B antagonist                    |
| 1518          | 0.985      | 5 Hydroxytryptamine 1D antagonist                    |
| 7461          | 0.968      | 5 Hydroxytryptamine 2 antagonist                     |
| 5262          | 0.979      | 5 Hydroxytryptamine 2A antagonist                    |
| 1154          | 0.993      | 5 Hydroxytryptamine 2C agonist                       |
| 2825          | 0.977      | 5 Hydroxytryptamine 2C antagonist                    |
| 2432          | 0.986      | 5 Hydroxytryptamine 3 antagonist                     |
| 2548          | 0.988      | 5 Hydroxytryptamine 6 antagonist                     |
| 1272          | 0.985      | 5 Hydroxytryptamine 7 antagonist                     |
| 6367          | 0.984      | 5 Hydroxytryptamine agonist                          |
| 18747         | 0.967      | 5 Hydroxytryptamine antagonist                       |
| 23            | 0.909      | 5 Hydroxytryptamine release stimulant                |
| 7398          | 0.985      | 5 Hydroxytryptamine uptake inhibitor                 |
| 16            | 0.886      | 5 Hydroxytryptamine uptake stimulant                 |
| 244           | 0.997      | AMPA receptor agonist                                |
| 2988          | 0.987      | Acetylcholine M2 receptor antagonist                 |
| 1604          | 0.979      | Acetylcholine nicotinic agonist                      |
| 2865          | 0.978      | Acetylcholine nicotinic antagonist                   |
| 4749          | 0.986      | Adenosine A1 receptor antagonist                     |
| 6432          | 0.985      | Adenosine A2 receptor antagonist                     |
| 4912          | 0.986      | Adenosine A2a receptor antagonist                    |
| 8976          | 0.977      | Adenosine receptor antagonist                        |
| 4131          | 0.983      | Adrenaline uptake inhibitor                          |
| 1069          | 0.987      | Alpha 1 adrenoreceptor agonist                       |
| 2759          | 0.973      | Alpha 2 adrenoreceptor antagonist                    |
| 1935          | 0.983      | Alpha adrenoreceptor agonist                         |
| 7610          | 0.971      | Alpha adrenoreceptor antagonist                      |
| 921           | 0.984      | Amidase inhibitor                                    |
| 822           | 0.985      | Androgen agonist                                     |
| 482           | 0.985      | Benzodiazepine agonist                               |
| 69            | 0.99       | Benzodiazepine inverse agonist                       |
| 2664          | 0.999      | Beta 3 adrenoreceptor agonist                        |
| 449           | 0.978      | Beta 3 adrenoreceptor antagonist                     |
| 5416          | 0.985      | Beta adrenoreceptor agonist                          |
| 69            | 0.998      | Bombesin 1 receptor antagonist                       |
| 4             | 1.000      | Carnitine O-acetyltransferase stimulant              |
| 2153          | 0.996      | Cholecystokinin B antagonist                         |
| 1600          | 0.995      | Corticotropin releasing factor 1 receptor antagonist |
| 681           | 0.998      | Corticotropin releasing factor antagonist            |
| 8375          | 0.983      | Dopamine D2 antagonist                               |
| 538           | 0.994      | Dopamine D3 agonist                                  |
| 2896          | 0.983      | Dopamine agonist                                     |

|       |       |                                                  |
|-------|-------|--------------------------------------------------|
| 185   | 0.999 | Dopamine autoreceptor agonist                    |
| 217   | 0.987 | Dopamine beta hydroxylase inhibitor              |
| 3932  | 0.985 | Dopamine uptake inhibitor                        |
| 3593  | 0.987 | GABA A receptor antagonist                       |
| 446   | 0.989 | GABA B receptor antagonist                       |
| 1112  | 0.966 | GABA receptor agonist                            |
| 74    | 0.997 | GABA uptake inhibitor                            |
| 177   | 0.850 | Galanin receptor 3 antagonist                    |
| 211   | 0.839 | Galanin receptor antagonist                      |
| 1212  | 0.996 | Glutamate (mGluR2) antagonist                    |
| 312   | 0.993 | Glutamate (mGluR3) antagonist                    |
| 3014  | 0.990 | Glutamate (mGluR5) antagonist                    |
| 71    | 0.954 | Glutamate release inhibitor                      |
| 30    | 0.992 | Inositol monophosphatase inhibitor               |
| 11    | 0.969 | Lipocortins synthesis antagonist                 |
| 2623  | 0.972 | MAO A inhibitor                                  |
| 3993  | 0.977 | MAO B inhibitor                                  |
| 5366  | 0.964 | MAO inhibitor                                    |
| 593   | 0.994 | Melatonin agonist                                |
| 1290  | 0.995 | Melatonin antagonist                             |
| 929   | 0.987 | NMDA 2B receptor antagonist                      |
| 27    | 0.999 | NMDA receptor glycine site B antagonist          |
| 731   | 0.997 | NMDA receptor glycine site antagonist            |
| 4539  | 0.992 | Neurokinin 1 antagonist                          |
| 1751  | 0.990 | Neurokinin 2 antagonist                          |
| 1515  | 0.993 | Neurokinin 3 antagonist                          |
| 2712  | 0.971 | Neuropeptide Y antagonist                        |
| 9     | 0.857 | Neurotransmitter antagonist                      |
| 14    | 1.000 | Nicotinamide phosphoribosyltransferase stimulant |
| 434   | 0.983 | Nicotinic alpha4beta2 receptor antagonist        |
| 907   | 0.995 | Nociceptin (N/OFQ) receptor antagonist           |
| 3884  | 0.970 | Opioid kappa receptor antagonist                 |
| 989   | 0.943 | P-glycoprotein 1 inhibitor                       |
| 2887  | 0.983 | Phosphodiesterase 4B inhibitor                   |
| 7501  | 0.980 | Phosphodiesterase IV inhibitor                   |
| 19589 | 0.958 | Phosphodiesterase inhibitor                      |
| 2217  | 0.953 | Phospholipase A2 inhibitor                       |
| 14    | 0.977 | Sigma 1 receptor agonist                         |
| 26    | 0.963 | Sigma receptor agonist                           |
| 2242  | 0.991 | Sigma receptor antagonist                        |
| 11475 | 0.960 | Sodium channel blocker                           |
| 3146  | 0.992 | Substance P antagonist                           |
| 322   | 0.991 | Tryptophan 5 hydroxylase inhibitor               |
| 525   | 0.997 | Vasopressin 1B antagonist                        |

IAP – Invariant Accuracy of Prediction calculated by leave-one-out cross-validation. It is equal AUC value.

**Table S2.** Number of active compounds and accuracy of prediction (IAP) for antischizophrenic effect and related mechanisms of action.

| <b>Number</b> | <b>IAP</b> | <b>Predictable Activity Type</b>          |
|---------------|------------|-------------------------------------------|
| 48            | 0.910      | Antischizophrenic                         |
| 7461          | 0.968      | 5 Hydroxytryptamine 2 antagonist          |
| 5262          | 0.979      | 5 Hydroxytryptamine 2A antagonist         |
| 2825          | 0.977      | 5 Hydroxytryptamine 2C antagonist         |
| 2432          | 0.986      | 5 Hydroxytryptamine 3 antagonist          |
| 2548          | 0.988      | 5 Hydroxytryptamine 6 antagonist          |
| 1272          | 0.985      | 5 Hydroxytryptamine 7 antagonist          |
| 244           | 0.997      | AMPA receptor agonist                     |
| 2030          | 0.992      | AMPA receptor antagonist                  |
| 1835          | 0.992      | Acetylcholine M1 receptor agonist         |
| 411           | 0.997      | Acetylcholine M4 receptor agonist         |
| 2284          | 0.988      | Acetylcholine muscarinic agonist          |
| 1604          | 0.979      | Acetylcholine nicotinic agonist           |
| 4131          | 0.983      | Adrenaline uptake inhibitor               |
| 1069          | 0.987      | Alpha 1 adrenoreceptor agonist            |
| 912           | 0.966      | Alpha 2c adrenoreceptor antagonist        |
| 7610          | 0.971      | Alpha adrenoreceptor antagonist           |
| 4992          | 0.917      | Antioxidant                               |
| 5416          | 0.985      | Beta adrenoreceptor agonist               |
| 1242          | 0.963      | Beta amyloid protein antagonist           |
| 4816          | 0.972      | Butyrylcholinesterase inhibitor           |
| 3868          | 0.984      | Cannabinoid CB1 receptor antagonist       |
| 5721          | 0.986      | Cannabinoid receptor agonist              |
| 455           | 0.995      | Catechol O-methyltransferase inhibitor    |
| 2153          | 0.996      | Cholecystokinin B antagonist              |
| 9662          | 0.959      | Cholinergic antagonist                    |
| 591           | 0.997      | Dopamine D1 agonist                       |
| 1613          | 0.981      | Dopamine D1 antagonist                    |
| 8375          | 0.983      | Dopamine D2 antagonist                    |
| 538           | 0.994      | Dopamine D3 agonist                       |
| 3789          | 0.984      | Dopamine D3 antagonist                    |
| 2387          | 0.986      | Dopamine D4 antagonist                    |
| 10756         | 0.980      | Dopamine antagonist                       |
| 185           | 0.999      | Dopamine autoreceptor agonist             |
| 588           | 0.996      | Estrogen receptor beta agonist            |
| 885           | 0.994      | Glutamate (mGluR2) agonist                |
| 114           | 0.993      | Glutamate (mGluR3) agonist                |
| 1999          | 0.996      | Glycine transporter 1 inhibitor           |
| 5057          | 0.993      | Histamine H3 receptor antagonist          |
| 1660          | 0.977      | Inducible nitric-oxide synthase inhibitor |
| 6006          | 0.977      | NMDA receptor antagonist                  |
| 389           | 0.960      | Nav1.3 sodium channel blocker             |
| 6191          | 0.983      | Nav1.7 sodium channel blocker             |
| 788           | 0.979      | Nav1.8 sodium channel blocker             |
| 1515          | 0.993      | Neurokinin 3 antagonist                   |
| 6147          | 0.989      | Neurokinin antagonist                     |
| 252           | 0.985      | Neurotensin receptor antagonist           |

|      |       |                                            |
|------|-------|--------------------------------------------|
| 975  | 0.988 | Nicotinic alpha7 receptor agonist          |
| 3094 | 0.970 | Nitric-oxide synthase inhibitor            |
| 21   | 0.901 | Nitric-oxide synthase stimulant            |
| 5265 | 0.984 | Opioid mu receptor antagonist              |
| 5287 | 0.992 | Phosphodiesterase 10A inhibitor            |
| 604  | 0.993 | Phosphodiesterase 9A inhibitor             |
| 845  | 0.967 | Phosphodiesterase I inhibitor              |
| 964  | 0.988 | Prolyl endopeptidase inhibitor             |
| 14   | 0.977 | Sigma 1 receptor agonist                   |
| 1058 | 0.997 | Sigma 1 receptor antagonist                |
| 585  | 0.998 | Sigma 2 receptor antagonist                |
| 12   | 1.000 | Sigma 3 receptor antagonist                |
| 2242 | 0.991 | Sigma receptor antagonist                  |
| 2739 | 0.993 | Sphingosine 1-phosphate receptor 1 agonist |
| 628  | 0.996 | Sphingosine 1-phosphate receptor 3 agonist |
| 186  | 0.987 | Sphingosine 1-phosphate receptor 4 agonist |
| 297  | 0.986 | Sphingosine 1-phosphate receptor 5 agonist |
| 311  | 0.991 | Sphingosine kinase 1 inhibitor             |
| 629  | 0.970 | Trace amine-associated receptor 1 agonist  |
| 102  | 0.980 | Vanilloid 2 antagonist                     |
| 195  | 0.992 | Vesicle monoamine transporter 2 inhibitor  |
| 1616 | 0.981 | p38 MAP kinase inhibitor                   |

IAP – Invariant Accuracy of Prediction calculated by leave-one-out cross-validation. It is equal AUC value.
